# Supplementary material for: Wie theoriebasiert sind Forschungsbeiträge zur Bildungsbeteiligung? Eine Qualitative Inhaltsanalyse ausgewählter Fachzeitschriften der Erwachsenen- und Weiterbildungsforschung
Source: Springer Nature journal article supplement (doi:10.1007/s40955-022-00229-3), 2022-11-04

| Kategoriensystem/Kodierschema                                                                                     |                                                                                                                                                                                                                                                                                                                                   | Kodierleitfaden                                                                                                                                                                                                                                                                                                                                                                                                                                                                                                                                                                                                                                     |                                                                                                                                                                                                                                                                                                                                                                                                                                                                                                                                                                                                                                                                                                                                                                                                                                                                        |                                                                                                                                                                                                                  |
|-------------------------------------------------------------------------------------------------------------------|-----------------------------------------------------------------------------------------------------------------------------------------------------------------------------------------------------------------------------------------------------------------------------------------------------------------------------------|-----------------------------------------------------------------------------------------------------------------------------------------------------------------------------------------------------------------------------------------------------------------------------------------------------------------------------------------------------------------------------------------------------------------------------------------------------------------------------------------------------------------------------------------------------------------------------------------------------------------------------------------------------|------------------------------------------------------------------------------------------------------------------------------------------------------------------------------------------------------------------------------------------------------------------------------------------------------------------------------------------------------------------------------------------------------------------------------------------------------------------------------------------------------------------------------------------------------------------------------------------------------------------------------------------------------------------------------------------------------------------------------------------------------------------------------------------------------------------------------------------------------------------------|------------------------------------------------------------------------------------------------------------------------------------------------------------------------------------------------------------------|
| Kategorie                                                                                                         | Ausprägung                                                                                                                                                                                                                                                                                                                        | Definition                                                                                                                                                                                                                                                                                                                                                                                                                                                                                                                                                                                                                                          | Ankerbeispiel                                                                                                                                                                                                                                                                                                                                                                                                                                                                                                                                                                                                                                                                                                                                                                                                                                                          | Kodierregeln bei Grenzfällen                                                                                                                                                                                     |
| Grad der Theorieeinbindung<br><br>Kodiert wird der höchste vorliegende Grad der Einbindung pro Auswertungseinheit | keine Theorieeinbindung                                                                                                                                                                                                                                                                                                           | Es wird keine Theorie im Beitrag erwähnt.                                                                                                                                                                                                                                                                                                                                                                                                                                                                                                                                                                                                           | x Durchführen einer Literaturreview, ohne eine Theorie zu erwähnen:<br>"To summarize, the least educated face numerous deterrents. To lessen earnings inequality (Autor, 2014), reduce literacy classism (Quigley, 2017), and remain economically vibrant, the United States needs to raise skill levels of the <i>entire</i> population (Carnevale et al., 2013; Reder, 2010), including the forgotten 90%" (Patterson 2018)                                                                                                                                                                                                                                                                                                                                                                                                                                          |                                                                                                                                                                                                                  |
|                                                                                                                   | Theorie wird zitiert                                                                                                                                                                                                                                                                                                              | Theorie wird lediglich zitiert, ohne weitere Bezüge zur Forschung herzustellen.                                                                                                                                                                                                                                                                                                                                                                                                                                                                                                                                                                     |                                                                                                                                                                                                                                                                                                                                                                                                                                                                                                                                                                                                                                                                                                                                                                                                                                                                        | x Theorie muss explizit benannt werden, das unkommentierte zitieren einer prinzipiell relevanten Publikation reicht nicht aus -> keine Theorieeinbindung                                                         |
|                                                                                                                   | von Theorie geleitet                                                                                                                                                                                                                                                                                                              | Beitrag nimmt auf Theorie Bezug, ohne sie weiter anzuwenden, bspw.:<br>- Theorie wird diskutiert, um Ausrichtung/Relevanz/Forschungsfragen/Hypothesen/Design der Studie zu begründen<br>- Theorie wird herangezogen, um die Ergebnisse zu erklären oder zu diskutieren                                                                                                                                                                                                                                                                                                                                                                              | x Mit Theorie wird das Forschungsdesign begründet:<br>"Following the integrated model of participation in adult education (Boeren et al., 2010), course counts and participation in adult education can be seen as the result of an interplay of supply and demand. [...] This approach guides the structure of our argument; [...] Despite the exceptional data and models employed in our study, it has clear limitations. First, our analyses were based on organizational data. However, our theoretical considerations also refer to the individual level. Thus, we cannot directly test any of the assumptions that we made on the individual level. Consequentially, we also cannot test the mechanisms" (Martin, Granderath, Rüber 2020)                                                                                                                       |                                                                                                                                                                                                                  |
|                                                                                                                   | Theorieanwendung                                                                                                                                                                                                                                                                                                                  | Forschung wendet die Theorie an, bspw.:<br>- für die theoriegeleitete Erstellung der Erhebungsinstrumente (z.B. Fragebögen/Fragebatterien/psychometrische Skalen/Interviewleitfäden)<br>- für die theoriegeleitete Erstellung der Auswertungsinstrumente (z.B. Kategoriensystem/Analyse-/Kodierschema/statistische Analysen)                                                                                                                                                                                                                                                                                                                        | x Theorie wird in Formulierung der Hypothesen sowie in die Diskussion der Ergebnisse eingebunden:<br>"In the analysis of training determinants, it is worth noticing that training has two main roles. [...] These functions can be linked to two theoretical perspectives: the human capital (Becker, 1964) and the job matching theory (Jovanovic, 1979), respectively. Although these two perspectives do not discuss the distinction by education types, their logic will be extended to formulate the working hypotheses of this paper. [...] Findings differ between Germany and England and this difference is likely to reflect the function workplace training plays in the two countries; whether it is considered as an investment in human capital or as a 'bridge' between the skills possessed by employees and those demanded on the job" (Icardi 2019) | x Theorie muss von vornherein in die Erhebungs- /Auswertungsinstrumenteentwicklung einbezogen werden, nicht erst im Nachhinein zu den Ergebnissen der Auswertung in Bezug gesetzt werden -> von Theorie geleitet |
| Theorieprüfung                                                                                                    | Beitrag überprüft und bewertet die Güte einer Theorie, bspw.:<br>- durch Analyse der theoretischen Konstrukte und ihrer Bezüge<br>- mithilfe angemessener (statistischer oder qualitativer) Analysen oder einem geeigneten ([quasi-]experimentellen) Forschungsdesign<br>- ggf. auch im expliziten Vergleich mit anderen Theorien | x Theorie wird für die Konstruktion der analysierten Konstrukte genutzt:<br>"Die institutionellen Faktoren lassen sich zu theoretischen Konstrukten – im Folgenden „Faktorenbündel“ – zusammenfassen, da in der geplanten Analyse nur eine begrenzte Anzahl an Bedingungen aufgenommen werden kann (Schneider und Wagemann 2007, S. 101–104). Die als theoretisch relevant identifizierten institutionellen Faktoren werden also durch Faktorenbündel repräsentiert und für die Analyse entsprechend der Annahme benannt, in welche Richtung sie als Bedingungen auf geringe relative Nachteile Älterer in der Weiterbildung wirken" (Philipp 2020) | x Theorie wird operationalisiert und empirisch getestet:<br>"On the basis of these precepts, we have formulated a theoretical assumption which we then link with the selected empirical indicators [...] Generally, our empirical findings are largely in line with the tested theoretical concept of Ulrich Beck [...] The presented paper sought to establish a relationship among a number of the developmental tendencies of the risk society and the main trends in NFE, and subsequently to empirically test Beck's theoretical framework as a suitable starting model for explaining certain developmental patterns in the area of further education and training (a diachronic dimension)" (Kalenda & Kočvarová 2020)                                                                                                                                          | x eine reine Diskussion der "Brauchbarkeit" der Theorie für den Gegenstand ist nicht ausreichend -> von Theorie geleitet                                                                                         |
|                                                                                                                   |                                                                                                                                                                                                                                                                                                                                   |                                                                                                                                                                                                                                                                                                                                                                                                                                                                                                                                                                                                                                                     | x Theorie wird hinsichtlich ihrer Relevanz für die Analyse diskutiert:<br>"We can conclude that the increase of participation in NFE in the Czech Republic is not primarily influenced by building a strong welfare state or by effective social policy, as might be inferred from the bounded agency model (Rubenson & Desjardins, 2009), but on the contrary by the significant neoliberalization of NFE and employer involvement as key factors in the adult education system" (Kalenda, Kočvarová, Vaculíková 2020)                                                                                                                                                                                                                                                                                                                                                |                                                                                                                                                                                                                  |
|                                                                                                                   |                                                                                                                                                                                                                                                                                                                                   |                                                                                                                                                                                                                                                                                                                                                                                                                                                                                                                                                                                                                                                     | x Theorie wird zur theoriegeleiteten Analyse genutzt:<br>"Wir wollen dem in der Folge nachgehen, indem wir Bourdieus Konzepte des „Kapitals“ und des „Habitus“ auf den Zusammenhang von Ressourcen und Weiterbildungsteilnahme beziehen. [...] Schließlich resümieren wir die Überlegungen und betrachten, inwiefern der Habitus als System von Dispositionen auch als Ressource für die widerständige Nicht-Teilnahme an Weiterbildung fruchtbar gemacht werden kann." (Bremer & Pape 2019)                                                                                                                                                                                                                                                                                                                                                                           |                                                                                                                                                                                                                  |
|                                                                                                                   |                                                                                                                                                                                                                                                                                                                                   |                                                                                                                                                                                                                                                                                                                                                                                                                                                                                                                                                                                                                                                     | x Theorie wird für die Konstruktion der analysierten Konstrukte genutzt:<br>"Die institutionellen Faktoren lassen sich zu theoretischen Konstrukten – im Folgenden „Faktorenbündel“ – zusammenfassen, da in der geplanten Analyse nur eine begrenzte Anzahl an Bedingungen aufgenommen werden kann (Schneider und Wagemann 2007, S. 101–104). Die als theoretisch relevant identifizierten institutionellen Faktoren werden also durch Faktorenbündel repräsentiert und für die Analyse entsprechend der Annahme benannt, in welche Richtung sie als Bedingungen auf geringe relative Nachteile Älterer in der Weiterbildung wirken" (Philipp 2020)                                                                                                                                                                                                                    |                                                                                                                                                                                                                  |
|                                                                                                                   |                                                                                                                                                                                                                                                                                                                                   |                                                                                                                                                                                                                                                                                                                                                                                                                                                                                                                                                                                                                                                     | x Anwendung einer Theorie auf eine neue empirische Situation, deren Erklärungsgehalt analysiert wird:<br>"This study combined the JDR model and SDT to better understand how teachers' commitment to professional learning can be stimulated. Specifically, it investigated to what extent the effects of job demands and job resources on teachers' commitment to professional learning, as manifested by their learning frequency and engagement, can be explained through basic psychological need satisfaction and consequent autonomous motivation" (Jansen in de Wal, van den Beemt, Martens, den Brok 2018)                                                                                                                                                                                                                                                     |                                                                                                                                                                                                                  |

|                       |                                                                                                                                                                                                                                                                                                                                        |                                                                                                                                                                                                                                                                                        |                                                                                                                                                                                                                                                                                                                                                                                                                                                                                                                                                                                                                                                                                                                                                  |                                                                                                                                                                                                                                                                                                                                                                                                                           |
|-----------------------|----------------------------------------------------------------------------------------------------------------------------------------------------------------------------------------------------------------------------------------------------------------------------------------------------------------------------------------|----------------------------------------------------------------------------------------------------------------------------------------------------------------------------------------------------------------------------------------------------------------------------------------|--------------------------------------------------------------------------------------------------------------------------------------------------------------------------------------------------------------------------------------------------------------------------------------------------------------------------------------------------------------------------------------------------------------------------------------------------------------------------------------------------------------------------------------------------------------------------------------------------------------------------------------------------------------------------------------------------------------------------------------------------|---------------------------------------------------------------------------------------------------------------------------------------------------------------------------------------------------------------------------------------------------------------------------------------------------------------------------------------------------------------------------------------------------------------------------|
|                       | Theoriebildung                                                                                                                                                                                                                                                                                                                         | Theorie wird (weiter-)entwickelt, d.h. entweder eine neue Theorie entwickelt oder eine bestehende Theorie ergänzt/erweitert/verändert, bspw.:<br>- durch die Änderung der theoretischen Konstrukte oder ihrer Beziehungen<br>- durch das Hinzufügen/Wegnehmen theoretischer Konstrukte | x Eine neue Theorie wird entwickelt und getestet:<br>"Being aware of the multi-level nature of the drivers and barriers to participation in AL, our aim is to design an explanatory model capturing AL participation in its complex nature. We fit our model to available empirical data and specifically look at how differently the model fits when explaining the participation of the identified groups of interest. Using empirical evidence at the European level, allows us to adopt a supra-individual comparative framework that covers the multiple layers of the complex problem in order to reveal those barriers that distinguish participants from nonparticipants in distinct societies" (Cabus, Ilieva-Trichkova, Štefánik 2020) | x Es muss eine neue bzw. veränderte Theorie beschrieben werden, und nicht nur die Anwendung bestehender Bezüge auf eine neue empirische Situation -> Theorieanwendung oder Theorieprüfung<br><br>x Eine Literaturreview oder Aufzählung verschiedener (neu identifizierter) Faktoren ist nicht ausreichend, es muss eine kohärente Theorie mit spezifizierten Bezügen dargelegt werden -> (je nach Ausprägung andere Art) |
|                       | andere Art der Theorieeinbindung                                                                                                                                                                                                                                                                                                       | Restkategorie: die Art der Theorieeinbindung kann keiner anderen Kategorie zugeordnet werden.                                                                                                                                                                                          |                                                                                                                                                                                                                                                                                                                                                                                                                                                                                                                                                                                                                                                                                                                                                  |                                                                                                                                                                                                                                                                                                                                                                                                                           |
| Forschungsmethodik    | qualitativ-empirisch                                                                                                                                                                                                                                                                                                                   | Qualitativ-empirische Methoden werden eingesetzt (bzw. eine Methode wird mit qualitativem Fokus eingesetzt).                                                                                                                                                                           | x Interview:<br>"Die qualitativ-empirische Studie, auf die wir uns beziehen (ausführlich Pape 2018) [...] geben wir zunächst Einblick in drei ausgewählte Interviews" (Bremer & Pape 2019)<br><br>x dokumentarische Methode:<br>"This qualitative study is trying to make a deeper and wider understanding of the participation and nonparticipation [...] The field study and the analysis of the data of this research was conducted by documentary method" (Bağcı 2019)                                                                                                                                                                                                                                                                       | x Ausschließlich qualitative Methoden werden eingesetzt.                                                                                                                                                                                                                                                                                                                                                                  |
|                       | quantitativ-empirisch                                                                                                                                                                                                                                                                                                                  | Quantitativ-empirische Methoden werden eingesetzt (bzw. eine Methode wird mit quantitativem Fokus eingesetzt).                                                                                                                                                                         | x Fragebogenbefragung:<br>"we use data from the European Union Labour Force Survey (EU-LFS) collected in 2016" (Cabus, Ilieva-Trichkova, Štefánik 2020)<br><br>x Regressionsanalyse:<br>"Ein multivariates Regressionsmodell soll aufklären, inwiefern es sich bei diesen Beobachtungen um gegenüber Dritteffekten robuste Zusammenhänge handelt" (Müller & Wenzelmann 2020)                                                                                                                                                                                                                                                                                                                                                                     | x Ausschließlich quantitative Methoden werden eingesetzt.                                                                                                                                                                                                                                                                                                                                                                 |
|                       | triangulativ bzw. Mixed-Methods-Design                                                                                                                                                                                                                                                                                                 | Qualitative und quantitative Methoden/Vorgehensweisen werden kombiniert.                                                                                                                                                                                                               | x Kombination von Fragebogenbefragung und Interview:<br>"The strength of our study is that it draws on longitudinal panel quantitative and qualitative data. Longitudinal quantitative data spanning 25 years allow us to examine educational trajectories over a substantial portion of the life course. The qualitative data provide a more in-depth insight into the reasons for engagement or non-engagement with lifelong learning" (Chesters, Cuervo, Fu 2020)                                                                                                                                                                                                                                                                             | x Sowohl qualitative als auch quantitative Methoden werden eingesetzt.<br>x Eine deskriptive, quantifizierende Darstellung im Anschluss an eine qualitative Analyse ist nicht ausreichend -> qualitativ-empirisch                                                                                                                                                                                                         |
|                       | (quasi-)experimentell<br>andere oder unklare Forschungsmethodik                                                                                                                                                                                                                                                                        | Ein (quasi-)experimentelles Forschungsdesign wird eingesetzt.<br>Restkategorie: die Forschungsmethodik kann keiner anderen Kategorie zugeordnet werden.                                                                                                                                |                                                                                                                                                                                                                                                                                                                                                                                                                                                                                                                                                                                                                                                                                                                                                  |                                                                                                                                                                                                                                                                                                                                                                                                                           |
| Art der Datenerhebung | Primärerhebung                                                                                                                                                                                                                                                                                                                         | Die Daten, die in der Studie ausgewertet werden, werden eigens für diese Studie erhoben.                                                                                                                                                                                               | x Die Daten werden eigens für diese Studie erhoben: "The data in this research were collected through biographic narrative interviews with Turkish immigrants in Germany. [...] Indeed, 26 narrative interviews were conducted in Turkish" (Bağcı 2019)                                                                                                                                                                                                                                                                                                                                                                                                                                                                                          | x Wird im Beitrag darauf verwiesen, dass bereits erhobene Daten einer anderen Studie analysiert werden -> Sekundäranalyse                                                                                                                                                                                                                                                                                                 |
|                       | Sekundäranalyse                                                                                                                                                                                                                                                                                                                        | Die Daten, die in der Studie ausgewertet werden, existieren bereits und werden nicht eigens für diese Studie erhoben.                                                                                                                                                                  | x Die Daten wurden bereits in einem anderen Forschungsvorhaben erhoben:<br>"Die qualitativ-empirische Studie, auf die wir uns beziehen (ausführlich Pape 2018) [...] Der Blick auf die übrigen Interviews der Studie (Pape 2018, S. 154 ff.) unterstreicht [...] Allerdings zeigen unsere Befunde, dass" (Bremer & Pape 2019)                                                                                                                                                                                                                                                                                                                                                                                                                    |                                                                                                                                                                                                                                                                                                                                                                                                                           |
|                       | andere oder unklare Art der Datenerhebung                                                                                                                                                                                                                                                                                              | Restkategorie: die Art der Datenerhebung kann keiner anderen Kategorie zugeordnet werden.                                                                                                                                                                                              | x Die Daten stellen einen öffentlich zugänglichen Datensatz, bspw. eines Large-Scale Assessments, dar:<br>"Data made available by the 2012 Survey of Adult Skills, a product of the Programme for the International Assessment of Adult Competencies (PIAAC) as well as the 1994–1998 International Adult Literacy Survey (IALS) are used as sources" (Desjardins, Ioannidou 2020)                                                                                                                                                                                                                                                                                                                                                               |                                                                                                                                                                                                                                                                                                                                                                                                                           |
| eingebundene Theorie  | durch tatsächliche Ausprägung am Material gefüllt;<br><i>kodiert werden nur Theorien, die Bildungsbeteiligung zum Gegenstand haben bzw. darauf bezogen werden;</i><br><i>kodiert wird nur die Theorie mit dem höchsten vorliegenden Grad der Theorieeinbindung, sind hier mehrere Ausprägungen vorhanden, werden alle aufgenommen;</i> |                                                                                                                                                                                                                                                                                        |                                                                                                                                                                                                                                                                                                                                                                                                                                                                                                                                                                                                                                                                                                                                                  |                                                                                                                                                                                                                                                                                                                                                                                                                           |

Fachzeitschrift  
Jahr  
Ausgabe  
Staat Erstautor:in  
Sprache

werden direkt aus Beitrag extrahiert

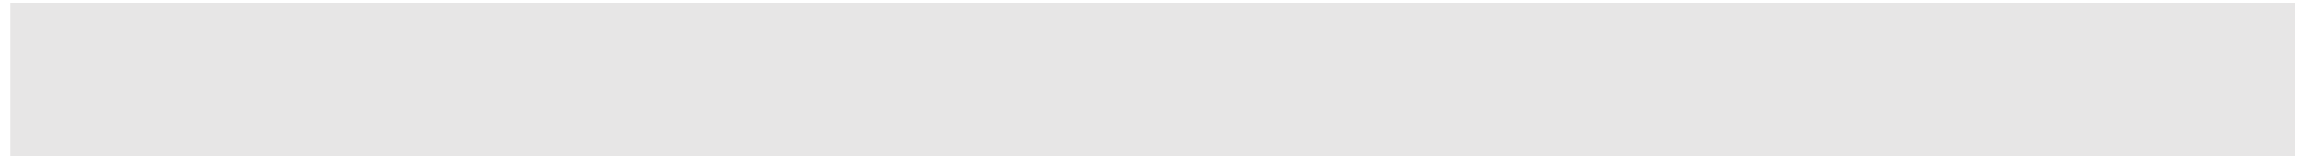

Supplement: MOESM2 [file 40955_2022_229_MOESM2_ESM.pdf]
