# Supplementary material for: Wie theoriebasiert sind Forschungsbeiträge zur Bildungsbeteiligung? Eine Qualitative Inhaltsanalyse ausgewählter Fachzeitschriften der Erwachsenen- und Weiterbildungsforschung
Source: Springer Nature journal article supplement (doi:10.1007/s40955-022-00229-3), 2022-11-04
Supplement: MOESM1 [file 40955_2022_229_MOESM1_ESM.pdf]

## Anwendung der Auswahlkriterien

Zur Demonstration der Anwendung der im Beitrag dargelegten Kriterien seien einige Fälle genannt, in denen *gegen* eine Aufnahme entschieden wurde:

- Vrieling et al. (2019) untersuchen Entstehensbedingungen für kollaboratives *social learning* unter Lehrer:innen im Kontext der beruflichen Weiterentwicklung. Dies stellt keine Teilnahme an *organisierter* Weiterbildung dar; folglich wurde der Beitrag nicht miteinbezogen.

Vrieling, E., van den Beemt, A. & de Laat, M. (2019). Facilitating social learning in teacher education: a case study. *Studies in Continuing Education*, 1(41), S. 76–93.  
<https://doi.org/10.1080/0158037X.2018.1466779>.

- Diep et al. (2019) untersuchen verschiedene *Qualitäten* der Beteiligung an einer Veranstaltung, allerdings nicht die Beteiligung bzw. Nicht-Beteiligung per se.

Ähnlich verhält es sich im Beitrag von Zhao et al. (2019), die lediglich die *Teilnahmebereitschaft* untersuchen, was jedoch nicht mit einer tatsächlichen Teilnahme gleichzusetzen ist. Beide Beiträge wurden daher nicht miteinbezogen.

Diep, A. N., Zhu, C., Cocquyt, C., de Greef, M. & Vanwing, T. (2019). Adult learners' social connectedness and online participation: the importance of online interaction quality. *Studies in Continuing Education*, 3(41), S. 326–346. <https://doi.org/10.1080/0158037X.2018.1518899>.

Zhao, D., Chen, Y., Parolin, B. & Fan, X. (2019). New Professional Farmers' Training (NPFT): A multivariate analysis of farmers' participation in lifelong learning in Shaanxi, China. *International Review of Education*, 4(65), S. 579–604. <https://doi.org/10.1007/s11159-019-09790-5>.

- Lee (2018) entwirft eine Theorie, die als Grundlage für vergleichende empirische Analysen der Weiterbildungsbeteiligung verschiedener Länder dienen kann, forscht dabei allerdings selbst nicht empirisch. Dieser Beitrag wurde daher nicht miteinbezogen (ein Beitrag, der diese Theorie mit in das empirische Forschungsdesign integriert (Lee und Desjardins 2019), jedoch schon).

Lee, J. (2018). Conceptual foundations for understanding inequality in participation in adult learning and education (ALE) for international comparisons. *International Journal of Lifelong Education*, 3(37), S. 297–314. <https://doi.org/10.1080/02601370.2018.1462265>.

Auch ein Beitrag, der in die Analyse aufgenommen wurde, sei beispielhaft genannt: Müller und Wenzelmann (2020) untersuchen die Weiterbildungsbeteiligung der erwerbsnahen 18- bis 64-Jährigen in Deutschland anhand der Daten einer Erhebung des Bundesinstituts für Berufsbildung (BIBB). Nach der Darlegung theoretischer Vorüberlegungen beschreiben sie den Datensatz deskriptiv, bevor sie mithilfe eines Regressionsmodells Determinanten der Weiterbildungsbeteiligung bestimmen. Zuletzt werden die Ergebnisse in die bisherige Forschung zum Thema eingeordnet und Anregungen für weitere Forschungsarbeiten gegeben.

Die resultierenden 38 in die Analyse einbezogenen Beiträge sind untenstehend verzeichnet.

## Verzeichnis der analysierten Beiträge

- Amponsah, S., Torto, B. A. & Badu-Nyarko, S. K. (2018). Ghanaian mature students' motivation to pursue degree programmes through distance education. *International Review of Education*, 5(64), S. 585–606. <https://doi.org/10.1007/s11159-018-9728-8>.
- Bağcı, Ş. E. (2019). Migration and Participation in Adult Education: The Matthew Effect on Immigrants. *Adult Education Quarterly*, 4(69), S. 271–294. <https://doi.org/10.1177/0741713619848108>.
- Bremer, H. & Pape, N. (2019). Habitus als Ressource der (Nicht-)Teilnahme an Weiterbildung. Überlegungen am Beispiel der Alphabetisierungsforschung. *Hessische Blätter für Volksbildung*, 4(69), S. 365–376.
- Brosens, D., Croux, F. & Donder, L. de (2019). Barriers to prisoner participation in educational courses: Insights from a remand prison in Belgium. *International Review of Education*, 5(65), S. 735–754. <https://doi.org/10.1007/s11159-018-9727-9>.
- Brown, A. & Bimrose, J. (2018). Drivers of learning for the low skilled. *International Journal of Lifelong Education*, 2(37), S. 151–167. <https://doi.org/10.1080/02601370.2017.1378934>.
- Cabus, S., Ilieva-Trichkova, P. & Štefánik, M. (2020). Multi-layered perspective on the barriers to learning participation of disadvantaged adults. *Zeitschrift für Weiterbildungsforschung*, 2(43), S. 169–196. <https://doi.org/10.1007/s40955-020-00162-3>.
- Chae, S. E. & Kang, G. (2018). Determinants of older Korean adults' participation in life-long learning programmes and life satisfaction. *International Journal of Lifelong Education*, 6(37), S. 689–700. <https://doi.org/10.1080/02601370.2018.1528306>.
- Chesters, J., Cuervo, H. & Fu, J. (2020). Re-engagement with education over the life course: motivations and barriers. *International Journal of Lifelong Education*, 2(39), S. 154–167. <https://doi.org/10.1080/02601370.2020.1720330>.
- Desjardins, R. & Ioannidou, A. (2020). The political economy of adult learning systems—some institutional features that promote adult learning participation. *Zeitschrift für Weiterbildungsforschung*, 2(43), S. 143–168. <https://doi.org/10.1007/s40955-020-00159-y>.
- Douglas, J., Kilpatrick, S., Katersky Barnes, R., Alderson, R. & Flittner, N. (2020). Embedding tertiary education in rural communities: building 'warm connections'. *Studies in Continuing Education*, 1(42), S. 61–74. <https://doi.org/10.1080/0158037X.2018.1548435>.
- Elliott, G. (2018). Widening higher education participation in rural communities in England: An anchor institution model. *International Review of Education*, 1(64), S.65–84. <https://doi.org/10.1007/s11159-017-9696-4>.
- Hovdhaugen, E. & Opheim, V. (2018). Participation in adult education and training in countries with high and low participation rates: demand and barriers. *International Journal of Lifelong Education*, 5(37), S. 560–577. <https://doi.org/10.1080/02601370.2018.1554717>.

- Icardi, R. (2019). Does workplace training participation vary by type of secondary level qualification? England and Germany in comparison. *International Journal of Lifelong Education*, 6(38), S. 615–631. <https://doi.org/10.1080/02601370.2019.1689434>.
- Ilieva-Trichkova, P. & Boyadjieva, P. (2020). Young people's agency over continuing education in situations of early job insecurity: from enabling to stumbling. *Studies in Continuing Education*, 3(42), S. 279–297. <https://doi.org/10.1080/0158037X.2019.1615424>.
- Jansen in de Wal, J., van den Beemt, A., Martens, R. L. & Brok, P. J. den (2020). The relationship between job demands, job resources and teachers' professional learning: is it explained by self-determination theory? *Studies in Continuing Education*, 1(42), S. 17–39. <https://doi.org/10.1080/0158037X.2018.1520697>.
- Kalenda, J. & Kočvarová, I. (2020). Participation in non-formal education in risk society. ahead-of-print. *International Journal of Lifelong Education*. <https://doi.org/10.1080/02601370.2020.1808102>.
- Kalenda, J., Kočvarová, I. & Vaculíková, J. (2020). Determinants of Participation in Nonformal Education in the Czech Republic. *Adult Education Quarterly*, 2(70), S. 99–118. <https://doi.org/10.1177/0741713619878391>.
- Lee, J. & Desjardins, R. (2019). Inequality in adult learning and education participation: the effects of social origins and social inequality. *International Journal of Lifelong Education*, 3(38), S. 339–359. <https://doi.org/10.1080/02601370.2019.1618402>.
- Lukowski, F., Baum, M. & Mohr, S. (2020). Technology, tasks and training – evidence on the provision of employer-provided training in times of technological change in Germany. ahead-of-print. *Studies in Continuing Education*. <https://doi.org/10.1080/0158037X.2020.1759525>.
- Manger, T., Eikeland, O. J. & Asbjørnsen, A. (2019). Why do not more prisoners participate in adult education? An analysis of barriers to education in Norwegian prisons. *International Review of Education*, 5(65), S. 711–733. <https://doi.org/10.1007/s11159-018-9724-z>.
- Mania, E. (2019). Temporale Bezüge bei Regulativen der Weiterbildungsbeteiligung. *Zeitschrift für Weiterbildungsforschung*, 2(42), S. 201–219. <https://doi.org/10.1007/s40955-019-0138-8>.
- Marcaletti, F., Iñiguez Berrozpe, T. & Koutra, K. (2018). Overcoming age barriers: motivation for mature adults' engagement in education. *International Journal of Lifelong Education*, 4(37), S. 451–467. <https://doi.org/10.1080/02601370.2018.1505782>.
- Martin, A., Granderath, J. S. & Rüber, I. E. (2020). Course Profiles and Participation in German Adult Education Centers During Times of Migration: A Longitudinal Study. ahead-of-print. *Adult Education Quarterly*. <https://doi.org/10.1177/0741713620982544>.
- Müller, N. & Wenzelmann, F. (2020). Berufliche Weiterbildung – Teilnahme und Abstinenz. *Zeitschrift für Weiterbildungsforschung*, 1(43), S. 47–73. <https://doi.org/10.1007/s40955-019-0141-0>.
- Patterson, M. B. (2018). The Forgotten 90%: Adult Nonparticipation in Education. *Adult Education Quarterly*, 1(68), S. 41–62. <https://doi.org/10.1177/0741713617731810>.

- Philipps, V. (2020). Berufliche Weiterbildungsbeteiligung von Älteren im europäischen Vergleich – Welche Rolle spielen Institutionen? *Zeitschrift für Weiterbildungsforschung*, 2(43), S. 197–226. <https://doi.org/10.1007/s40955-020-00156-1>.
- Rabl, T. (2020). Schaffung eines lernförderlichen betrieblichen Umfelds. *Weiterbildung*, 5(31), S. 21–23.
- Rodriguez-Gomez, D., Ion, G., Mercader, C. & López-Crespo, S. (2020). Factors promoting informal and formal learning strategies among school leaders. *Studies in Continuing Education*, 2(42), S. 240–255. <https://doi.org/10.1080/0158037X.2019.1600492>.
- Roosmaa, E.-L., Martma, L. & Saar, E. (2019). Vocational upper-secondary education and participation in non-formal education: a comparison of European countries. *International Journal of Lifelong Education*, 3(38), S. 268–286. <https://doi.org/10.1080/02601370.2019.1586779>.
- Stöhr, I. & Baur, H.-R. (2018). Zu weit weg? Lokale Angebotsstruktur als Zugangsbedingung für Weiterbildung. *Magazin erwachsenenbildung.at*, 34.
- Støren, L. A. & Børing, P. (2018a). Immigrants' participation in non-formal job-related training. *International Journal of Lifelong Education*, 5(37), S. 598–614. <https://doi.org/10.1080/02601370.2018.1554719>.
- Støren, L. A. & Børing, P. (2018b). Training of various durations: Do we find the same social predictors as for training participation rates. *International Journal of Lifelong Education*, 5(37), S. 527–545. <https://doi.org/10.1080/02601370.2018.1490933>.
- Tikkanen, T. & Nissinen, K. (2018). Drivers of job-related learning among low-educated employees in the Nordic countries. *International Journal of Lifelong Education*, 5(37), S. 615–632. <https://doi.org/10.1080/02601370.2018.1554720>.
- Vaculíková, J., Kalenda, J. & Kočvarová, I. (2020). Hidden gender differences in formal and non-formal adult education. ahead-of-print. *Studies in Continuing Education*. <https://doi.org/10.1080/0158037X.2020.1732334>.
- Vater, S. & Zwieler, P. (2018). Bildung für alle? Wer an Volkshochschulkursen teilnimmt und wer nicht. *Magazin erwachsenenbildung.at*, 34.
- Venegas-Muggli, J. I. (2020). Higher education dropout of non-traditional mature freshmen: the role of sociodemographic characteristics. *Studies in Continuing Education*, 3(42), S. 316–332. <https://doi.org/10.1080/0158037X.2019.1652157>.
- Yamashita, T., Cummins, P. A., Millar, R. J., Sahoo, S. & Smith, T. J. (2019). Associations between motivation to learn, basic skills, and adult education and training participation among older adults in the USA. *International Journal of Lifelong Education*, 5(38), S. 538–552. <https://doi.org/10.1080/02601370.2019.1666927>.
- Zanazzi, S. (2018). Investing in skills to overcome the crisis? Low-skilled workers in Italy: European strategies, policies and structural weaknesses. *International Journal of Lifelong Education*, 2(37), S. 216–233. <https://doi.org/10.1080/02601370.2017.1406542>.
